# Supplementary material for: Scalable Wettability Modification of Aluminum Surface through Single-Shot Nanosecond Laser Processing
Source: Nanomaterials (Basel). 2023 Apr 17;13(8):1392. doi: 10.3390/nano13081392 (PMC10145128; doi:10.3390/nano13081392)
Supplement: Supplementary file 1 [file nanomaterials-13-01392-s001.zip]

Archive with 5 entries (5 files):
- Supporting information.pdf
- Video S1.mp4
- Video S2-High quality.mp4
- Video S3-High quality.mp4
- Video S4-High quality-use.mp4
